# Supplementary material for: Assessment of primary rehabilitation needs in neurological rehabilitation: translation, adaptation and face validity of the Danish version of Rehabilitation Complexity Scale-Extended
Source: Springer Nature journal article supplement (doi:10.1186/s12883-016-0728-7), 2016-10-21
Supplement: MOESM2 [file 10937816]

## **English version of Rehabilitation Complexity Scale-Extended**

Rehabilitation Complexity Scale-Extended, English version is published in reference 7 and 8 as noticed in the paper

7. Turner-Stokes L, Disler R, Williams H. The Rehabilitation Complexity Scale: a simple, practical tool to identify 'complex specialised' services in neurological rehabilitation. *Clin Med.* 2007;7: 593-599.

8. Turner-Stokes L, Scott H, Williams H, Siegert R. The Rehabilitation Complexity Scale--extended version: detection of patients with highly complex needs. *Disabil Rehabil.* 2012;34: 715-720. doi: 10.3109/09638288.2011.615880 [doi].

### **The RCS-E is also available from King's College London**

<http://www.kcl.ac.uk/lsm/research/divisions/cicelysaunders/resources/tools/rcse.aspx>. Follow the link "To obtain the clinical tool, please contact the [UKROC team.](#)"
